# Supplementary material
Source: MDPI journal article supplement (https://www.mdpi.com/2304-6775/11/4/51)
Supplement: s1 [file s1]

**Table S1: Scopus Minor Subject Categories and Their Subject Category Indices**

| ASJC | Description                                                  | J    | SC   | USC | DOMI | RANK<br>(DOMI) |
|------|--------------------------------------------------------------|------|------|-----|------|----------------|
| 1000 | Multidisciplinary                                            | 112  | 160  | 35  | 0.70 | 1              |
| 1100 | General Agricultural and Biological Sciences                 | 209  | 592  | 95  | 0.35 | 80             |
| 1101 | Agricultural and Biological Sciences (miscellaneous)         | 114  | 406  | 99  | 0.28 | 225            |
| 1102 | Agronomy and Crop Science                                    | 370  | 1142 | 76  | 0.32 | 129            |
| 1103 | Animal Science and Zoology                                   | 441  | 1178 | 78  | 0.37 | 59             |
| 1104 | Aquatic Science                                              | 229  | 641  | 54  | 0.36 | 73             |
| 1105 | Ecology, Evolution, Behavior and Systematics                 | 682  | 1935 | 109 | 0.35 | 83             |
| 1106 | Food Science                                                 | 346  | 1041 | 116 | 0.33 | 117            |
| 1107 | Forestry                                                     | 153  | 449  | 60  | 0.34 | 100            |
| 1108 | Horticulture                                                 | 95   | 289  | 35  | 0.33 | 124            |
| 1109 | Insect Science                                               | 167  | 459  | 46  | 0.36 | 69             |
| 1110 | Plant Science                                                | 482  | 1416 | 78  | 0.34 | 101            |
| 1111 | Soil Science                                                 | 145  | 483  | 56  | 0.30 | 184            |
| 1200 | General Arts and Humanities                                  | 156  | 372  | 47  | 0.42 | 36             |
| 1201 | Arts and Humanities (miscellaneous)                          | 373  | 1290 | 119 | 0.29 | 200            |
| 1202 | History                                                      | 1399 | 4221 | 98  | 0.33 | 121            |
| 1203 | Language and Linguistics                                     | 924  | 2986 | 67  | 0.31 | 164            |
| 1204 | Archeology                                                   | 327  | 1149 | 53  | 0.28 | 214            |
| 1205 | Classics                                                     | 132  | 454  | 19  | 0.29 | 196            |
| 1206 | Conservation                                                 | 98   | 350  | 42  | 0.28 | 230            |
| 1207 | History and Philosophy of Science                            | 164  | 469  | 83  | 0.35 | 87             |
| 1208 | Literature and Literary Theory                               | 901  | 2653 | 41  | 0.34 | 105            |
| 1209 | Museology                                                    | 67   | 213  | 24  | 0.31 | 154            |
| 1210 | Music                                                        | 162  | 374  | 39  | 0.43 | 27             |
| 1211 | Philosophy                                                   | 665  | 1589 | 83  | 0.42 | 37             |
| 1212 | Religious studies                                            | 518  | 1286 | 56  | 0.40 | 42             |
| 1213 | Visual Arts and Performing Arts                              | 560  | 1646 | 68  | 0.34 | 103            |
| 1300 | General Biochemistry, Genetics and Molecular Biology         | 209  | 644  | 86  | 0.32 | 128            |
| 1301 | Biochemistry, Genetics and Molecular Biology (miscellaneous) | 66   | 276  | 80  | 0.24 | 324            |
| 1302 | Aging                                                        | 36   | 121  | 42  | 0.30 | 188            |
| 1303 | Biochemistry                                                 | 422  | 1682 | 129 | 0.25 | 298            |
| 1304 | Biophysics                                                   | 138  | 518  | 93  | 0.27 | 263            |
| 1305 | Biotechnology                                                | 285  | 1129 | 137 | 0.25 | 296            |
| 1306 | Cancer Research                                              | 209  | 628  | 60  | 0.33 | 115            |
| 1307 | Cell Biology                                                 | 272  | 989  | 94  | 0.28 | 238            |
| 1308 | Clinical Biochemistry                                        | 118  | 446  | 63  | 0.26 | 269            |
| 1309 | Developmental Biology                                        | 78   | 270  | 54  | 0.29 | 203            |
| 1310 | Endocrinology                                                | 123  | 413  | 49  | 0.30 | 187            |
| 1311 | Genetics                                                     | 338  | 1193 | 98  | 0.28 | 217            |
| 1312 | Molecular Biology                                            | 396  | 1488 | 107 | 0.27 | 266            |

|                                                            |     |      |     |      |     |
|------------------------------------------------------------|-----|------|-----|------|-----|
| 1313 Molecular Medicine                                    | 166 | 656  | 70  | 0.25 | 295 |
| 1314 Physiology                                            | 180 | 645  | 92  | 0.28 | 234 |
| 1315 Structural Biology                                    | 48  | 176  | 42  | 0.27 | 242 |
| 1400 General Business, Management and Accounting           | 192 | 501  | 72  | 0.38 | 52  |
| 1401 Business, Management and Accounting (miscellaneous)   | 140 | 490  | 76  | 0.29 | 211 |
| 1402 Accounting                                            | 158 | 489  | 37  | 0.32 | 130 |
| 1403 Business and International Management                 | 400 | 1379 | 82  | 0.29 | 197 |
| 1404 Management Information Systems                        | 118 | 464  | 53  | 0.25 | 291 |
| 1405 Management of Technology and Innovation               | 261 | 1002 | 99  | 0.26 | 280 |
| 1406 Marketing                                             | 192 | 615  | 69  | 0.31 | 158 |
| 1407 Organizational Behavior and Human Resource Management | 207 | 675  | 64  | 0.31 | 174 |
| 1408 Strategy and Management                               | 447 | 1547 | 95  | 0.29 | 202 |
| 1409 Tourism, Leisure and Hospitality Management           | 132 | 385  | 58  | 0.34 | 97  |
| 1410 Industrial relations                                  | 54  | 196  | 40  | 0.28 | 236 |
| 1500 General Chemical Engineering                          | 251 | 820  | 91  | 0.31 | 176 |
| 1501 Chemical Engineering (miscellaneous)                  | 47  | 189  | 52  | 0.25 | 306 |
| 1502 Bioengineering                                        | 144 | 621  | 86  | 0.23 | 329 |
| 1503 Catalysis                                             | 57  | 205  | 49  | 0.28 | 235 |
| 1504 Chemical Health and Safety                            | 12  | 47   | 19  | 0.26 | 288 |
| 1505 Colloid and Surface Chemistry                         | 20  | 82   | 28  | 0.24 | 316 |
| 1506 Filtration and Separation                             | 15  | 52   | 18  | 0.29 | 206 |
| 1507 Fluid Flow and Transfer Processes                     | 77  | 309  | 83  | 0.25 | 303 |
| 1508 Process Chemistry and Technology                      | 64  | 257  | 62  | 0.25 | 304 |
| 1600 General Chemistry                                     | 371 | 1119 | 93  | 0.33 | 119 |
| 1601 Chemistry (miscellaneous)                             | 55  | 223  | 74  | 0.25 | 310 |
| 1602 Analytical Chemistry                                  | 127 | 462  | 71  | 0.27 | 239 |
| 1603 Electrochemistry                                      | 49  | 167  | 41  | 0.29 | 192 |
| 1604 Inorganic Chemistry                                   | 69  | 245  | 47  | 0.28 | 222 |
| 1605 Organic Chemistry                                     | 172 | 614  | 65  | 0.28 | 229 |
| 1606 Physical and Theoretical Chemistry                    | 163 | 576  | 80  | 0.28 | 218 |
| 1607 Spectroscopy                                          | 67  | 252  | 58  | 0.27 | 267 |
| 1700 General Computer Science                              | 209 | 527  | 96  | 0.40 | 45  |
| 1701 Computer Science (miscellaneous)                      | 87  | 346  | 91  | 0.25 | 297 |
| 1702 Artificial Intelligence                               | 266 | 1091 | 102 | 0.24 | 317 |
| 1703 Computational Theory and Mathematics                  | 153 | 681  | 82  | 0.22 | 330 |
| 1704 Computer Graphics and Computer-Aided Design           | 90  | 341  | 60  | 0.26 | 271 |
| 1705 Computer Networks and Communications                  | 337 | 1278 | 103 | 0.26 | 272 |
| 1706 Computer Science Applications                         | 725 | 2758 | 187 | 0.26 | 276 |
| 1707 Computer Vision and Pattern Recognition               | 88  | 374  | 62  | 0.24 | 326 |
| 1708 Hardware and Architecture                             | 153 | 619  | 56  | 0.25 | 309 |
| 1709 Human-Computer Interaction                            | 122 | 487  | 70  | 0.25 | 299 |
| 1710 Information Systems                                   | 345 | 1361 | 120 | 0.25 | 293 |
| 1711 Signal Processing                                     | 98  | 405  | 62  | 0.24 | 320 |

|                                                           |     |      |     |      |     |
|-----------------------------------------------------------|-----|------|-----|------|-----|
| 1712 Software                                             | 364 | 1378 | 83  | 0.26 | 270 |
| 1800 General Decision Sciences                            | 39  | 133  | 41  | 0.29 | 193 |
| 1801 Decision Sciences (miscellaneous)                    | 18  | 73   | 38  | 0.25 | 311 |
| 1802 Information Systems and Management                   | 124 | 512  | 64  | 0.24 | 318 |
| 1803 Management Science and Operations Research           | 176 | 668  | 84  | 0.26 | 273 |
| 1804 Statistics, Probability and Uncertainty              | 152 | 504  | 69  | 0.30 | 183 |
| 1900 General Earth and Planetary Sciences                 | 187 | 414  | 59  | 0.45 | 23  |
| 1901 Earth and Planetary Sciences (miscellaneous)         | 126 | 392  | 66  | 0.32 | 134 |
| 1902 Atmospheric Science                                  | 131 | 376  | 56  | 0.35 | 90  |
| 1903 Computers in Earth Sciences                          | 58  | 216  | 52  | 0.27 | 257 |
| 1904 Earth-Surface Processes                              | 152 | 440  | 55  | 0.35 | 93  |
| 1905 Economic Geology                                     | 37  | 146  | 38  | 0.25 | 294 |
| 1906 Geochemistry and Petrology                           | 130 | 413  | 53  | 0.31 | 153 |
| 1907 Geology                                              | 268 | 785  | 71  | 0.34 | 99  |
| 1908 Geophysics                                           | 140 | 444  | 56  | 0.32 | 149 |
| 1909 Geotechnical Engineering and Engineering Geology     | 188 | 631  | 65  | 0.30 | 186 |
| 1910 Oceanography                                         | 132 | 416  | 56  | 0.32 | 142 |
| 1911 Paleontology                                         | 103 | 308  | 39  | 0.33 | 110 |
| 1912 Space and Planetary Science                          | 92  | 260  | 44  | 0.35 | 79  |
| 1913 Stratigraphy                                         | 42  | 150  | 20  | 0.28 | 231 |
| 2000 General Economics, Econometrics and Finance          | 252 | 596  | 71  | 0.42 | 34  |
| 2001 Economics, Econometrics and Finance (miscellaneous)  | 174 | 612  | 86  | 0.28 | 215 |
| 2002 Economics and Econometrics                           | 678 | 1877 | 102 | 0.36 | 71  |
| 2003 Finance                                              | 295 | 861  | 51  | 0.34 | 98  |
| 2100 General Energy                                       | 63  | 194  | 60  | 0.32 | 127 |
| 2101 Energy (miscellaneous)                               | 43  | 173  | 62  | 0.25 | 307 |
| 2102 Energy Engineering and Power Technology              | 209 | 776  | 90  | 0.27 | 254 |
| 2103 Fuel Technology                                      | 101 | 418  | 58  | 0.24 | 321 |
| 2104 Nuclear Energy and Engineering                       | 64  | 224  | 41  | 0.29 | 212 |
| 2105 Renewable Energy, Sustainability and the Environment | 206 | 784  | 106 | 0.26 | 277 |
| 2200 General Engineering                                  | 292 | 786  | 112 | 0.37 | 61  |
| 2201 Engineering (miscellaneous)                          | 118 | 439  | 111 | 0.27 | 256 |
| 2202 Aerospace Engineering                                | 120 | 441  | 70  | 0.27 | 247 |
| 2203 Automotive Engineering                               | 101 | 391  | 65  | 0.26 | 281 |
| 2204 Biomedical Engineering                               | 251 | 933  | 136 | 0.27 | 255 |
| 2205 Civil and Structural Engineering                     | 307 | 1090 | 97  | 0.28 | 221 |
| 2206 Computational Mechanics                              | 70  | 268  | 51  | 0.26 | 278 |
| 2207 Control and Systems Engineering                      | 244 | 979  | 94  | 0.25 | 302 |
| 2208 Electrical and Electronic Engineering                | 638 | 2057 | 125 | 0.31 | 163 |
| 2209 Industrial and Manufacturing Engineering             | 293 | 1028 | 118 | 0.29 | 213 |
| 2210 Mechanical Engineering                               | 560 | 2000 | 117 | 0.28 | 232 |
| 2211 Mechanics of Materials                               | 368 | 1389 | 82  | 0.26 | 268 |
| 2212 Ocean Engineering                                    | 84  | 291  | 56  | 0.29 | 205 |

|                                                  |     |      |     |      |     |
|--------------------------------------------------|-----|------|-----|------|-----|
| 2213 Safety, Risk, Reliability and Quality       | 164 | 604  | 112 | 0.27 | 250 |
| 2214 Media Technology                            | 47  | 173  | 38  | 0.27 | 248 |
| 2215 Building and Construction                   | 196 | 682  | 90  | 0.29 | 209 |
| 2216 Architecture                                | 143 | 525  | 63  | 0.27 | 245 |
| 2300 General Environmental Science               | 222 | 657  | 110 | 0.34 | 106 |
| 2301 Environmental Science (miscellaneous)       | 131 | 466  | 96  | 0.28 | 224 |
| 2302 Ecological Modeling                         | 33  | 134  | 45  | 0.25 | 312 |
| 2303 Ecology                                     | 431 | 1496 | 104 | 0.29 | 207 |
| 2304 Environmental Chemistry                     | 132 | 529  | 85  | 0.25 | 301 |
| 2305 Environmental Engineering                   | 168 | 679  | 97  | 0.25 | 308 |
| 2306 Global and Planetary Change                 | 102 | 410  | 63  | 0.25 | 305 |
| 2307 Health, Toxicology and Mutagenesis          | 132 | 501  | 87  | 0.26 | 274 |
| 2308 Management, Monitoring, Policy and Law      | 355 | 1315 | 123 | 0.27 | 253 |
| 2309 Nature and Landscape Conservation           | 189 | 708  | 64  | 0.27 | 261 |
| 2310 Pollution                                   | 143 | 594  | 85  | 0.24 | 323 |
| 2311 Waste Management and Disposal               | 110 | 456  | 73  | 0.24 | 322 |
| 2312 Water Science and Technology                | 239 | 818  | 84  | 0.29 | 194 |
| 2400 General Immunology and Microbiology         | 56  | 240  | 52  | 0.23 | 327 |
| 2401 Immunology and Microbiology (miscellaneous) | 13  | 55   | 29  | 0.24 | 325 |
| 2402 Applied Microbiology and Biotechnology      | 119 | 434  | 62  | 0.27 | 240 |
| 2403 Immunology                                  | 216 | 710  | 77  | 0.30 | 179 |
| 2404 Microbiology                                | 157 | 532  | 62  | 0.30 | 190 |
| 2405 Parasitology                                | 67  | 217  | 26  | 0.31 | 165 |
| 2406 Virology                                    | 70  | 227  | 32  | 0.31 | 166 |
| 2500 General Materials Science                   | 429 | 1355 | 97  | 0.32 | 146 |
| 2501 Materials Science (miscellaneous)           | 120 | 467  | 109 | 0.26 | 284 |
| 2502 Biomaterials                                | 114 | 463  | 79  | 0.25 | 313 |
| 2503 Ceramics and Composites                     | 113 | 418  | 51  | 0.27 | 251 |
| 2504 Electronic, Optical and Magnetic Materials  | 244 | 912  | 74  | 0.27 | 260 |
| 2505 Materials Chemistry                         | 287 | 1122 | 67  | 0.26 | 286 |
| 2506 Metals and Alloys                           | 147 | 552  | 53  | 0.27 | 264 |
| 2507 Polymers and Plastics                       | 142 | 508  | 61  | 0.28 | 233 |
| 2508 Surfaces, Coatings and Films                | 121 | 473  | 46  | 0.26 | 285 |
| 2600 General Mathematics                         | 366 | 687  | 78  | 0.53 | 7   |
| 2601 Mathematics (miscellaneous)                 | 59  | 157  | 42  | 0.38 | 58  |
| 2602 Algebra and Number Theory                   | 114 | 323  | 30  | 0.35 | 81  |
| 2603 Analysis                                    | 178 | 561  | 50  | 0.32 | 143 |
| 2604 Applied Mathematics                         | 571 | 1978 | 143 | 0.29 | 204 |
| 2605 Computational Mathematics                   | 158 | 620  | 76  | 0.25 | 290 |
| 2606 Control and Optimization                    | 106 | 457  | 58  | 0.23 | 328 |
| 2607 Discrete Mathematics and Combinatorics      | 84  | 264  | 39  | 0.32 | 139 |
| 2608 Geometry and Topology                       | 99  | 314  | 30  | 0.32 | 150 |
| 2609 Logic                                       | 35  | 102  | 31  | 0.34 | 96  |

|                                                |  |      |  |      |  |     |  |      |     |
|------------------------------------------------|--|------|--|------|--|-----|--|------|-----|
| 2610 Mathematical Physics                      |  | 70   |  | 259  |  | 42  |  | 0.27 | 252 |
| 2611 Modeling and Simulation                   |  | 287  |  | 1186 |  | 149 |  | 0.24 | 319 |
| 2612 Numerical Analysis                        |  | 79   |  | 322  |  | 49  |  | 0.25 | 314 |
| 2613 Statistics and Probability                |  | 248  |  | 797  |  | 84  |  | 0.31 | 160 |
| 2614 Theoretical Computer Science              |  | 119  |  | 452  |  | 46  |  | 0.26 | 275 |
| 2700 General Medicine                          |  | 1791 |  | 4220 |  | 219 |  | 0.42 | 33  |
| 2701 Medicine (miscellaneous)                  |  | 293  |  | 963  |  | 156 |  | 0.30 | 178 |
| 2702 Anatomy                                   |  | 43   |  | 142  |  | 44  |  | 0.30 | 180 |
| 2703 Anesthesiology and Pain Medicine          |  | 127  |  | 260  |  | 37  |  | 0.49 | 15  |
| 2704 Biochemistry (medical)                    |  | 63   |  | 245  |  | 56  |  | 0.26 | 282 |
| 2705 Cardiology and Cardiovascular Medicine    |  | 355  |  | 728  |  | 54  |  | 0.49 | 16  |
| 2706 Critical Care and Intensive Care Medicine |  | 105  |  | 254  |  | 37  |  | 0.41 | 38  |
| 2707 Complementary and alternative medicine    |  | 95   |  | 249  |  | 45  |  | 0.38 | 55  |
| 2708 Dermatology                               |  | 135  |  | 285  |  | 55  |  | 0.47 | 19  |
| 2709 Drug Guides                               |  | 4    |  | 13   |  | 10  |  | 0.31 | 168 |
| 2710 Embryology                                |  | 19   |  | 71   |  | 22  |  | 0.27 | 259 |
| 2711 Emergency Medicine                        |  | 97   |  | 253  |  | 44  |  | 0.38 | 51  |
| 2712 Endocrinology, Diabetes and Metabolism    |  | 229  |  | 654  |  | 62  |  | 0.35 | 86  |
| 2713 Epidemiology                              |  | 112  |  | 358  |  | 68  |  | 0.31 | 157 |
| 2714 Family Practice                           |  | 47   |  | 100  |  | 22  |  | 0.47 | 20  |
| 2715 Gastroenterology                          |  | 155  |  | 321  |  | 39  |  | 0.48 | 17  |
| 2716 Genetics (clinical)                       |  | 90   |  | 293  |  | 55  |  | 0.31 | 171 |
| 2717 Geriatrics and Gerontology                |  | 109  |  | 326  |  | 76  |  | 0.33 | 111 |
| 2718 Health Informatics                        |  | 108  |  | 343  |  | 66  |  | 0.31 | 152 |
| 2719 Health Policy                             |  | 266  |  | 745  |  | 93  |  | 0.36 | 75  |
| 2720 Hematology                                |  | 132  |  | 330  |  | 37  |  | 0.40 | 43  |
| 2721 Hepatology                                |  | 72   |  | 156  |  | 20  |  | 0.46 | 22  |
| 2722 Histology                                 |  | 60   |  | 191  |  | 35  |  | 0.31 | 155 |
| 2723 Immunology and Allergy                    |  | 205  |  | 618  |  | 63  |  | 0.33 | 118 |
| 2724 Internal Medicine                         |  | 139  |  | 363  |  | 51  |  | 0.38 | 53  |
| 2725 Infectious Diseases                       |  | 304  |  | 917  |  | 73  |  | 0.33 | 120 |
| 2726 Microbiology (medical)                    |  | 123  |  | 419  |  | 52  |  | 0.29 | 191 |
| 2727 Nephrology                                |  | 69   |  | 139  |  | 32  |  | 0.50 | 13  |
| 2728 Neurology (clinical)                      |  | 376  |  | 1046 |  | 83  |  | 0.36 | 72  |
| 2729 Obstetrics and Gynecology                 |  | 200  |  | 469  |  | 52  |  | 0.43 | 31  |
| 2730 Oncology                                  |  | 364  |  | 947  |  | 72  |  | 0.38 | 50  |
| 2731 Ophthalmology                             |  | 127  |  | 221  |  | 27  |  | 0.57 | 6   |
| 2732 Orthopedics and Sports Medicine           |  | 299  |  | 775  |  | 68  |  | 0.39 | 49  |
| 2733 Otorhinolaryngology                       |  | 113  |  | 264  |  | 31  |  | 0.43 | 29  |
| 2734 Pathology and Forensic Medicine           |  | 194  |  | 531  |  | 89  |  | 0.37 | 67  |
| 2735 Pediatrics, Perinatology and Child Health |  | 306  |  | 698  |  | 82  |  | 0.44 | 25  |
| 2736 Pharmacology (medical)                    |  | 261  |  | 748  |  | 88  |  | 0.35 | 89  |
| 2737 Physiology (medical)                      |  | 101  |  | 314  |  | 62  |  | 0.32 | 133 |

|                                                           |     |      |     |      |     |
|-----------------------------------------------------------|-----|------|-----|------|-----|
| 2738 Psychiatry and Mental health                         | 533 | 1445 | 96  | 0.37 | 64  |
| 2739 Public Health, Environmental and Occupational Health | 571 | 1646 | 172 | 0.35 | 92  |
| 2740 Pulmonary and Respiratory Medicine                   | 143 | 322  | 39  | 0.44 | 24  |
| 2741 Radiology, Nuclear Medicine and imaging              | 320 | 836  | 106 | 0.38 | 54  |
| 2742 Rehabilitation                                       | 139 | 421  | 66  | 0.33 | 123 |
| 2743 Reproductive Medicine                                | 81  | 249  | 39  | 0.33 | 125 |
| 2744 Reviews and References (medical)                     | 2   | 10   | 8   | 0.20 | 332 |
| 2745 Rheumatology                                         | 67  | 137  | 25  | 0.49 | 14  |
| 2746 Surgery                                              | 498 | 1168 | 76  | 0.43 | 32  |
| 2747 Transplantation                                      | 49  | 131  | 33  | 0.37 | 60  |
| 2748 Urology                                              | 109 | 236  | 42  | 0.46 | 21  |
| 2800 General Neuroscience                                 | 115 | 328  | 75  | 0.35 | 85  |
| 2801 Neuroscience (miscellaneous)                         | 32  | 106  | 36  | 0.30 | 182 |
| 2802 Behavioral Neuroscience                              | 78  | 278  | 65  | 0.28 | 226 |
| 2803 Biological Psychiatry                                | 44  | 157  | 32  | 0.28 | 228 |
| 2804 Cellular and Molecular Neuroscience                  | 91  | 286  | 50  | 0.32 | 140 |
| 2805 Cognitive Neuroscience                               | 105 | 402  | 62  | 0.26 | 279 |
| 2806 Developmental Neuroscience                           | 37  | 131  | 37  | 0.28 | 220 |
| 2807 Endocrine and Autonomic Systems                      | 24  | 94   | 24  | 0.26 | 289 |
| 2808 Neurology                                            | 173 | 564  | 66  | 0.31 | 173 |
| 2809 Sensory Systems                                      | 41  | 130  | 30  | 0.32 | 148 |
| 2900 General Nursing                                      | 131 | 226  | 42  | 0.58 | 5   |
| 2901 Nursing (miscellaneous)                              | 27  | 83   | 39  | 0.33 | 126 |
| 2902 Advanced and Specialized Nursing                     | 57  | 157  | 50  | 0.36 | 70  |
| 2903 Assessment and Diagnosis                             | 7   | 33   | 16  | 0.21 | 331 |
| 2904 Care Planning                                        | 9   | 33   | 13  | 0.27 | 243 |
| 2905 Community and Home Care                              | 39  | 116  | 32  | 0.34 | 108 |
| 2906 Critical Care Nursing                                | 19  | 45   | 12  | 0.42 | 35  |
| 2907 Emergency Nursing                                    | 28  | 69   | 12  | 0.41 | 41  |
| 2908 Fundamentals and skills                              | 13  | 41   | 18  | 0.32 | 144 |
| 2909 Gerontology                                          | 40  | 119  | 28  | 0.34 | 109 |
| 2910 Issues, ethics and legal aspects                     | 36  | 116  | 24  | 0.31 | 161 |
| 2911 Leadership and Management                            | 36  | 106  | 24  | 0.34 | 104 |
| 2912 LPN and LVN                                          | 16  | 60   | 22  | 0.27 | 262 |
| 2913 Maternity and Midwifery                              | 36  | 103  | 23  | 0.35 | 88  |
| 2914 Medical/Surgical Nursing                             | 22  | 56   | 16  | 0.39 | 46  |
| 2915 Nurse Assisting                                      | 2   | 5    | 4   | 0.40 | 44  |
| 2916 Nutrition and Dietetics                              | 131 | 369  | 52  | 0.36 | 78  |
| 2917 Oncology (nursing)                                   | 20  | 65   | 27  | 0.31 | 169 |
| 2919 Pediatrics                                           | 24  | 65   | 21  | 0.37 | 63  |
| 2920 Pharmacology (nursing)                               | 8   | 21   | 9   | 0.38 | 56  |
| 2921 Pshychiatric Mental Health                           | 39  | 122  | 32  | 0.32 | 137 |
| 2922 Research and Theory                                  | 13  | 35   | 15  | 0.37 | 62  |



|      |                                                            |      |      |     |      |     |
|------|------------------------------------------------------------|------|------|-----|------|-----|
| 2923 | Review and Exam Preparation                                | 4    | 13   | 7   | 0.31 | 170 |
| 3000 | General Pharmacology, Toxicology and Pharmaceutics         | 75   | 216  | 59  | 0.35 | 91  |
| 3001 | Pharmacology, Toxicology and Pharmaceutics (miscellaneous) | 29   | 103  | 39  | 0.28 | 223 |
| 3002 | Drug Discovery                                             | 146  | 571  | 68  | 0.26 | 287 |
| 3003 | Pharmaceutical Science                                     | 167  | 500  | 65  | 0.33 | 112 |
| 3004 | Pharmacology                                               | 305  | 973  | 85  | 0.31 | 156 |
| 3005 | Toxicology                                                 | 122  | 380  | 79  | 0.32 | 135 |
| 3100 | General Physics and Astronomy                              | 235  | 618  | 76  | 0.38 | 57  |
| 3101 | Physics and Astronomy (miscellaneous)                      | 55   | 156  | 54  | 0.35 | 82  |
| 3102 | Acoustics and Ultrasonics                                  | 39   | 122  | 42  | 0.32 | 138 |
| 3103 | Astronomy and Astrophysics                                 | 82   | 209  | 42  | 0.39 | 47  |
| 3104 | Condensed Matter Physics                                   | 399  | 1465 | 86  | 0.27 | 246 |
| 3105 | Instrumentation                                            | 129  | 451  | 83  | 0.29 | 210 |
| 3106 | Nuclear and High Energy Physics                            | 78   | 226  | 38  | 0.35 | 94  |
| 3107 | Atomic and Molecular Physics, and Optics                   | 195  | 640  | 77  | 0.30 | 177 |
| 3108 | Radiation                                                  | 53   | 184  | 39  | 0.29 | 208 |
| 3109 | Statistical and Nonlinear Physics                          | 52   | 189  | 44  | 0.28 | 237 |
| 3110 | Surfaces and Interfaces                                    | 52   | 213  | 34  | 0.24 | 315 |
| 3200 | General Psychology                                         | 210  | 435  | 62  | 0.48 | 18  |
| 3201 | Psychology (miscellaneous)                                 | 61   | 193  | 50  | 0.32 | 147 |
| 3202 | Applied Psychology                                         | 243  | 731  | 89  | 0.33 | 116 |
| 3203 | Clinical Psychology                                        | 293  | 805  | 70  | 0.36 | 68  |
| 3204 | Developmental and Educational Psychology                   | 332  | 1002 | 72  | 0.33 | 122 |
| 3205 | Experimental and Cognitive Psychology                      | 152  | 542  | 74  | 0.28 | 227 |
| 3206 | Neuropsychology and Physiological Psychology               | 63   | 232  | 36  | 0.27 | 249 |
| 3207 | Social Psychology                                          | 292  | 951  | 94  | 0.31 | 172 |
| 3300 | General Social Sciences                                    | 261  | 611  | 83  | 0.43 | 30  |
| 3301 | Social Sciences (miscellaneous)                            | 409  | 1336 | 131 | 0.31 | 175 |
| 3302 | Archeology                                                 | 287  | 993  | 56  | 0.29 | 201 |
| 3303 | Development                                                | 270  | 893  | 88  | 0.30 | 181 |
| 3304 | Education                                                  | 1388 | 3240 | 184 | 0.43 | 28  |
| 3305 | Geography, Planning and Development                        | 741  | 2332 | 123 | 0.32 | 141 |
| 3306 | Health (social science)                                    | 325  | 1094 | 123 | 0.30 | 189 |
| 3307 | Human Factors and Ergonomics                               | 42   | 144  | 63  | 0.29 | 195 |
| 3308 | Law                                                        | 803  | 1834 | 124 | 0.44 | 26  |
| 3309 | Library and Information Sciences                           | 245  | 601  | 73  | 0.41 | 39  |
| 3310 | Linguistics and Language                                   | 992  | 3133 | 76  | 0.32 | 145 |
| 3311 | Safety Research                                            | 96   | 358  | 80  | 0.27 | 258 |
| 3312 | Sociology and Political Science                            | 1286 | 3818 | 118 | 0.34 | 107 |
| 3313 | Transportation                                             | 115  | 407  | 71  | 0.28 | 219 |
| 3314 | Anthropology                                               | 424  | 1492 | 94  | 0.28 | 216 |
| 3315 | Communication                                              | 455  | 1294 | 77  | 0.35 | 84  |
| 3316 | Cultural Studies                                           | 1075 | 3712 | 97  | 0.29 | 198 |

|                                                          |     |      |    |      |     |
|----------------------------------------------------------|-----|------|----|------|-----|
| 3317 Demography                                          | 119 | 386  | 58 | 0.31 | 167 |
| 3318 Gender Studies                                      | 162 | 476  | 53 | 0.34 | 102 |
| 3319 Life-span and Life-course Studies                   | 52  | 165  | 38 | 0.32 | 151 |
| 3320 Political Science and International Relations       | 569 | 1597 | 67 | 0.36 | 76  |
| 3321 Public Administration                               | 189 | 566  | 64 | 0.33 | 113 |
| 3322 Urban Studies                                       | 232 | 802  | 80 | 0.29 | 199 |
| 3400 General Veterinary                                  | 187 | 357  | 42 | 0.52 | 8   |
| 3401 Veterinary (miscellaneous)                          | 16  | 63   | 30 | 0.25 | 292 |
| 3402 Equine                                              | 7   | 11   | 5  | 0.64 | 2   |
| 3403 Food Animals                                        | 32  | 90   | 24 | 0.36 | 77  |
| 3404 Small Animals                                       | 19  | 31   | 7  | 0.61 | 4   |
| 3500 General Dentistry                                   | 119 | 189  | 40 | 0.63 | 3   |
| 3501 Dentistry (miscellaneous)                           | 19  | 61   | 30 | 0.31 | 159 |
| 3502 Dental Assisting                                    | 1   | 7    | 7  | 0.14 | 333 |
| 3503 Dental Hygiene                                      | 3   | 11   | 7  | 0.27 | 244 |
| 3504 Oral Surgery                                        | 56  | 143  | 17 | 0.39 | 48  |
| 3505 Orthodontics                                        | 27  | 53   | 10 | 0.51 | 9   |
| 3506 Periodontics                                        | 14  | 38   | 11 | 0.37 | 65  |
| 3600 General Health Professions                          | 15  | 42   | 15 | 0.36 | 74  |
| 3601 Health Professions (miscellaneous)                  | 42  | 140  | 49 | 0.30 | 185 |
| 3602 Chiropractics                                       | 10  | 29   | 12 | 0.34 | 95  |
| 3603 Complementary and Manual Therapy                    | 17  | 53   | 14 | 0.32 | 136 |
| 3604 Emergency Medical Services                          | 9   | 35   | 16 | 0.26 | 283 |
| 3605 Health Information Management                       | 46  | 168  | 35 | 0.27 | 241 |
| 3606 Medical Assisting and Transcription                 | 1   | 2    | 2  | 0.50 | 10  |
| 3607 Medical Laboratory Technology                       | 37  | 139  | 46 | 0.27 | 265 |
| 3608 Medical Terminology                                 | 1   | 4    | 4  | 0.25 | 300 |
| 3609 Occupational Therapy                                | 25  | 75   | 21 | 0.33 | 114 |
| 3610 Optometry                                           | 11  | 27   | 7  | 0.41 | 40  |
| 3611 Pharmacy                                            | 28  | 87   | 20 | 0.32 | 132 |
| 3612 Physical Therapy, Sports Therapy and Rehabilitation | 229 | 626  | 66 | 0.37 | 66  |
| 3613 Podiatry                                            | 5   | 10   | 5  | 0.50 | 11  |
| 3614 Radiological and Ultrasound Technology              | 61  | 189  | 39 | 0.32 | 131 |
| 3615 Respiratory Care                                    | 1   | 2    | 2  | 0.50 | 12  |
| 3616 Speech and Hearing                                  | 63  | 203  | 41 | 0.31 | 162 |
